# Supplementary material
Source: MDPI journal article supplement (https://www.mdpi.com/2673-9623/2/1/1)
Supplement: s1 [file s1]

## Supplemental Information

### Summary Table of Compounds in *Uncaria tomentosa*

**Class**   *Group*   *Subclass*   *Subgroup*

#### 3. Alkaloids

##### 3.1. Indole Alkaloids

###### 3.1.1. Tetracyclic Indoloquinolizidine

Hirsutine, **1a**  
Corynantheine, **1b**  
Hirsutine, **2a**  
Dihydrocorynantheine, **2b**  
Hirsutine *N*-oxide, **3**  
Dihydrocorynantheine *N*-oxide, **4**

###### 3.1.2. Pentacyclic Indoloquinolizidine

Akuammigine, **5a**  
Izoajmalicine, **5b**  
Tetrahydroalstonine, **5c**  
19-epi-3-isoajmalicine, **5d**  
3 $\alpha$ -Dihydrocadambine, **6**

###### 3.1.3. $\beta$ -Carboline

Harman, **10**  
Lyaloside, **11**  
3,4-Dehydro-5-carboxystrictosidine, **12**  
5 $\alpha$ -Carboxystrictosidine, **13**  
Dolichantoside, **14**

##### 3.2. Oxindole Alkaloids

###### 3.2.1. Tetracyclic Oxindoles

Rynchophylline, **15a**  
Isorynchophylline, **15b**  
Corynoxine, **16a**  
Isocorynoxine, **16b**  
Rynchophylline *N*-oxide, **17**  
Isorynchophylline *N*-oxide, **18**  
18,19-Dehydrocorynoxinoic acid, **19**

###### 3.2.2. Pentacyclic Oxindoles

Uncarine B (Formosamine), **21a**  
Uncarine C (Pteropodine), **21b**  
Uncarine D (Speciophylline), **21c**  
Uncarine E (Isopteropodine), **21d**  
Uncarine F (Speciofiline), **21e**  
Mitraphylline, **21f**  
Isomitraphylline, **21g**  
Uncarine F *N*-oxide, **22**

#### 4. Polyphenols

##### 4.1. Flavonoids

###### 4.1.1. Flavones

Artochamin C, **23**  
5'-Hydroxycudraflavone A, **24**  
Dihydrocudraflavone B, **25**  
Apigenin, **26**  
Luteolin, **27**

###### 4.1.2. Flavonols

Kaempferol, **28**  
Quercetin, **29**  
Dihydrokaempferol, **30**  
Rutin, **31**  
Quercitrin, **32**

###### 4.1.3. Flavan-3-ols

###### 4.1.3.1. Procyanidin Type

(-)-Epicatechin, **35**  
(+)-Catechin, **36**  
Afezelechin, **37**

###### 4.1.3.2. Procyanidin Dimers

Procyanidin B1, **38**  
Procyanidin B2, **39**  
Procyanidin B3, **40**  
Procyanidin B4, **41**  
Procyanidin B5, **42**

Procyanidin B6, **43**

Procyanidin B7, **44**

#### 4.2. Miscellaneous Polyphenols

Cinchonain 1a, **45a**

Cinchonain 1b, **45b**

Ellagic Acid, **46**

#### 4.3. Phenolic Acids

##### 4.3.1. Hydroxybenzoic Acids

Benzoic acid, **47**

Salicylic acid, **48**

4-Hydroxybenzoic acid, **49**

Protocatechuic acid, **50**

Gallic acid, **51**

Syringic acid, **52**

Vanillic acid, **53**

##### 4.3.2. Hydroxycinnamic Acids

*p*-Coumaric acid, **54**

Caffeic acid, **55**

Ferulic acid, **56**

Isoferulic acid, **57**

Chlorogenic acid, **58**

### 5. Terpenes

#### 5.1. Phytosterols

$\beta$ -Sitosterol, **59**

Stigmasterol, **60**

Daucosterol, **61**

Campesterol, **62**

#### 5.2. Pentacyclic Triterpene Acids

Oleanolic Acid, **63**

Cincholic Acid, **64**

Ursolic Acid, **65**

Quinovic Acid, **66**

##### 5.2.1. Ursolic Acid Derivatives

(3 $\beta$ )-3-Hydroxy-7-oxo-urs-12-ene-27,28-dioic acid, **67**

(3 $\beta$ ,16 $\alpha$ )-16-Hydroxy-3-methoxy-ursa-12,19(29)-diene-27,28-dioic acid, **68**

(3 $\beta$ ,4 $\alpha$ )-3,19-Dihydroxy-6,23-dioxo-urs-12-en-28-oic acid, **69**

(3 $\beta$ ,4 $\alpha$ )-3,19,23-trihydroxy-6-oxo-urs-12-en-28-oic acid, **70**

(6 $\beta$ )-6,19-dihydroxy-3-oxo-urs-12-en-28-oic acid, **71**

(3 $\beta$ ,6 $\beta$ )-3,6,19-Trihydroxyurs-12-en-28-oic acid (uncaric acid), **72**

(3 $\beta$ ,4 $\alpha$ ,6 $\beta$ )-3,6,19-trihydroxy-23-oxo-norurs-12-en-28-oic acid, **73**

(3 $\beta$ ,4 $\alpha$ ,6 $\beta$ )-3,6,19-trihydroxy-23-oxo-urs-12-en-28-oic acid, **74**

(3 $\beta$ ,6 $\beta$ )-3,6,19-Trihydroxy-24-norursa-4(23),12-dien-28-oic acid (floridic acid), **75**

(3 $\beta$ ,4 $\alpha$ ,6 $\beta$ )-dimethyl ester-3,6,19-trihydroxy-urs-12-ene-23,28-dioic acid, **76**

(3 $\beta$ ,4 $\alpha$ ,6 $\beta$ )-3,6,19,23-tetrahydroxy-urs-12-en-28-oic acid, **77**

##### 5.2.2. Glycosylated Pentacyclic Triterpene Acids

###### 5.2.2.1. Cincholic Acid Derivatives

Cincholic acid 27-O- $\beta$ -D-fucopyranosyl-28-O- $\beta$ -D-glucopyranoside, **78**

Cincholic acid 27-O- $\beta$ -D-glucopyranosyl-(1 $\rightarrow$ 3)- $\beta$ -D-fucopyranoside, **79**

Cincholic acid 27-O- $\beta$ -D-glucopyranosyl-(1 $\rightarrow$ 3)- $\beta$ -D-fucopyranosyl-28-O- $\beta$ -D-glucopyranoside, **80**

Pyrocincholic acid 27-O- $\beta$ -D-glucopyranosyl-(1 $\rightarrow$ 3)- $\beta$ -D-fucopyranosyl-28-O- $\beta$ -D-glucopyranoside, **81** (Tomentoside B)

###### 5.2.2.2. Quinovic Acid Derivatives

Quinovic acid 3-O- $\beta$ -D-quinovopyranosyl-27-O- $\beta$ -D-glucopyranoside, **82**

Quinovic acid 3-O- $\beta$ -D-quinovopyranosyl-28-O- $\beta$ -D-glucopyranoside, **83**

Quinovic acid 3-O- $\alpha$ -L-rhamnoside, **84**

Quinovic acid 3-O- $\beta$ -D-fucopyranosyl-27-O- $\beta$ -D-glucopyranoside, **85**

Quinovic acid 3-O- $\beta$ -D-fucopyranosyl-28-O- $\beta$ -D-glucopyranoside, **86**

Quinovic acid 27-O- $\beta$ -D-glucopyranoside, **87**

Quinovic acid 3-O- $\beta$ -D-glucopyranosyl-(1 $\rightarrow$ 3)- $\beta$ -D-quinovopyranoside, **88**

Quinovic acid 3-O- $\beta$ -D-glucopyranosyl-(1 $\rightarrow$ 3)- $\beta$ -D-fucopyranoside, **89**

Quinovic acid 3-O- $\beta$ -D-glucopyranosyl-(1 $\rightarrow$ 3)- $\beta$ -D-fucopyranosyl-27-O- $\beta$ -D-glucopyranoside, **90**

Quinovic acid 3-O- $\beta$ -D-glucopyranosyl-(1 $\rightarrow$ 3)- $\beta$ -D-fucopyranosyl-28-O- $\beta$ -D-glucopyranoside, **91**

Quinovic acid 3-O- $\alpha$ -L-rhamnopyranosyl-(3 $\rightarrow$ 1)- $\beta$ -D-glucopyranoside, **92**

Quinovic acid 3-O- $\alpha$ -L-rhamnopyranosyl-(3 $\rightarrow$ 1)- $\beta$ -D-glucopyranosyl-27-O- $\beta$ -D-glucopyranoside, **93**

Quinovic acid 3-O- $\beta$ -D-galactopyranosyl-(1 $\rightarrow$ 3)- $\beta$ -D-quinovopyranoside, **94**

Pyroquinovic acid 3-O- $\beta$ -D-glucopyranosyl-(1 $\rightarrow$ 3)- $\beta$ -D-fucopyranosyl-28-O- $\beta$ -D-glucopyranoside (Tomentoside A), **95**

#### 5.3. Miscellaneous Terpenoid

7-deoxyloganin acid, **96**
